# Supplementary material
Source: Research Square preprint supplement (doi:10.21203/rs.3.rs-9989885/v1)
Supplement: Supplementary file 1 [file a4fcc1c33a6e62de2a8065db.docx]

**Additional file 1**

**Instructions** This general information questionnaire was developed by the authors for this cross-sectional study. It was administered by trained researchers to collect demographic, obstetric, clinical, and information-source information from pregnant women with gestational diabetes mellitus. Standardized scales in the questionnaire package were previously published validated instruments and are cited in the main manuscript. GDM, gestational diabetes mellitus; RMB, Renminbi.

**General information questionnaire**

| **No.** | **Item** | **Response option or value** |
| --- | --- | --- |
| 1 | Age | ____ years |
| 2 | Gestational age | ____ weeks |
| 3 | Pre-pregnancy weight and height | Pre-pregnancy weight: ____ kg; height: ____ cm |
| 4 | Adverse obstetric history | □ No □ Yes: __________ |
| 5 | Educational attainment | □ Primary school and below □ Junior school □ High school □ Bachelor's degree or above |
| 6 | Employment status | □ Employed □ Not employed |
| 7 | Permanent residence | □ Urban □ Rural |
| 8 | Medical insurance type | □ Basic medical insurance □ New rural cooperative medical insurance □ Self-pay |
| 9 | Monthly household income per capita | □ ≤3,000 RMB □ 3,000-5,000 RMB □ ≥5,000 RMB |
| 10 | Family history of diabetes | □ Yes □ No |
| 11 | Previous history of gestational diabetes mellitus | □ Yes □ No |
| 12 | Other pregnancy complications or comorbidities | □ No □ Yes: __________ |
| 13 | Gestational week at diagnosis | □ <24 weeks □ ≥24 weeks |
| 14 | Mode of conception | □ Natural conception □ Medically assisted conception |
| 15 | Planned mode of delivery | □ Planned vaginal delivery □ Planned cesarean section |
| 16 | Current method of blood glucose control | □ Non-pharmacological treatment □ Pharmacological treatment |
| 17 | Source of information | □ Online sources □ Offline sources □ Combination of online and offline sources |
| 18 | Receipt of GDM-related education | □ Yes □ No |
